# Supplementary material
Source: PubMed Central journal article supplement (PMC5866053)
Supplement: NIHMS406465-supplement-Supplementary_Data.pdf [file NIHMS406465-supplement-Supplementary_Data.pdf]

## Supplemental Figure 1

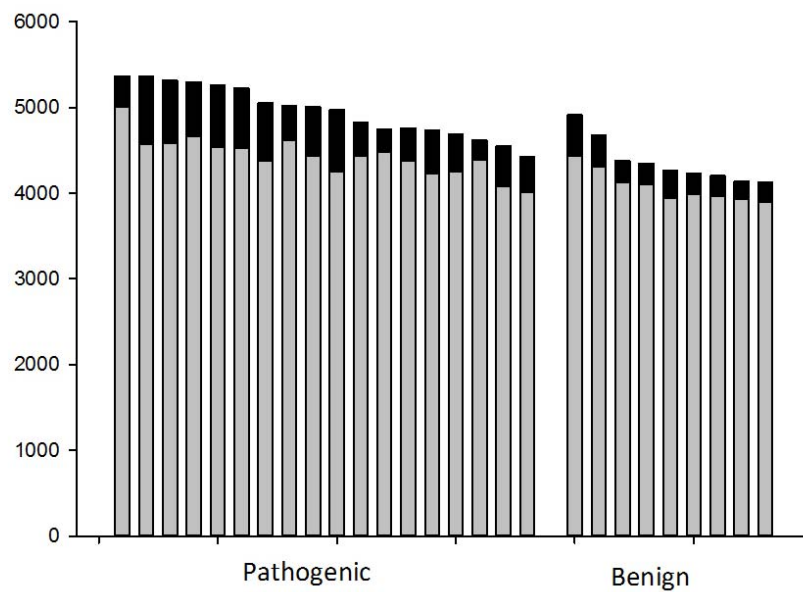

**Supplemental Figure 1.** Prophage content in pathogenic and benign *Escherichia* strains. Black, phage-derived genes; grey, non-phage-derived genes.

Supplemental Table 1. Bacterial genes (proteins),  
associated with virulence, that match POGs

| <b>POG#</b> | <b>Protein</b>                     | <b>Reference (PMID)</b>  |
|-------------|------------------------------------|--------------------------|
| POG0073     | Zona occludens toxin               | <a href="#">16775751</a> |
| POG0111     | Shiga toxin                        | 10074068                 |
| POG0150     | Zona occludens toxin               | 16775751                 |
| POG0156     | ClpP                               | 21855356                 |
| POG0157     | ClpP                               | 21855356                 |
| POG0158     | ClpP                               | 21855356                 |
| POG0234     | Bactoprenol<br>glucosyltransferase | 19717593,<br>10637639    |
| POG0304     | ThyA                               | 20347953                 |
| POG0306     | DNA-binding protein Hu/La          | 21212121                 |
| POG0413     | SopB                               | 22325603,<br>18725540    |
| POG0584     | NrdG                               | 21478338                 |
| POG0585     | NrdD                               | 21502590                 |
| POG0689     | Panton-Valentine leukocidin        | 21524624                 |
| POG0733     | N-6 DNA methylase                  | 11179656,<br>16489347    |
| POG1138     | Shiga toxin                        | 10074068                 |
| POG1139     | Shiga toxin                        | 10074068                 |
| POG1154     | OspB                               | 19017275                 |
| POG1199     | ExsB                               | 7635810                  |
| POG1935     | Eae-like adhesion protein          | 10211442                 |
| POG2016     | GalE                               | 10768949                 |
| POG2038     | Heme binding virulence factor      | 19564389                 |
| POG3134     | KpsF                               | 9383150                  |
| POG3603     | 6-PGD                              | 16634799                 |

## Supplemental Table 2: Assignment of the strains used in this work to pathogenic or non-pathogenic groups

| Strain                                              | Pathogenicity | Reference |
|-----------------------------------------------------|---------------|-----------|
| <b>Escherichia spp.</b>                             |               |           |
| Escherichia_coli_O26_H11_11368_uid41021             | P             | 2230233   |
| Escherichia_coli_O111_H_11128_uid41023              | P             | KEGG      |
| Escherichia_coli_O157_H7_EC4115_uid59091            | P             | KEGG      |
| Escherichia_coli_O157_H7_TW14359_uid59235           | P             | KEGG      |
| Escherichia_coli_O157_H7_Sakai_uid57781             | P             | KEGG      |
| Escherichia_coli_O103_H2_12009_uid41013             | P             | KEGG      |
| Escherichia_coli_O157_H7_EDL933_uid57831            | P             | KEGG      |
| Escherichia_coli_O55_H7_CB9615_uid46655             | P             | KEGG      |
| Escherichia_coli_IAI39_uid59381                     | P             | GOLD      |
| Escherichia_coli_S88_uid62979                       | P             | GOLD      |
| Escherichia_coli_APEC_O1_uid58623                   | P             | KEGG      |
| Escherichia_coli_O127_H6_E2348_69_uid59343          | P             | KEGG      |
| Escherichia_coli_UTI89_uid58541                     | P             | GOLD      |
| Escherichia_coli_UMN026_uid62981                    | P             | GOLD      |
| Escherichia_coli_CFT073_uid57915                    | P             | 11553558  |
| Escherichia_coli_E24377A_uid58395                   | P             | 22215741  |
| Escherichia_coli_536_uid58531                       | P             | 10894541  |
| Escherichia_coli_ED1a_uid59379                      | NP            | GOLD      |
| Escherichia_coli_SE11_uid59425                      | NP            | GOLD      |
| Escherichia_coli_55989_uid59383                     | P             | KEGG      |
| Escherichia_fergusonii_ATCC_35469_uid59375          | NP            | 22252367  |
| Escherichia_coli_HS_uid58393                        | NP            | GOLD      |
| Escherichia_coli__BL21_GOLDd_DE3_pLysS_AG__uid59245 | NP            | GOLD      |
| Escherichia_coli_IAI1_uid59377                      | NP            | 3         |
| Escherichia_coli_B_REL606_uid58803                  | NP            | GOLD      |
| Escherichia_coli_K_12_substr__DH10B_uid58979        | NP            | GOLD      |
| Escherichia_coli_K_12_substr__MG1655_uid57779       | NP            | GOLD      |
| <b>Bacillus spp.</b>                                |               |           |
| Bacillus_cereus_NC7401_uid82815                     | P             | 11883672  |
| Bacillus_cereus_AH187_uid58753                      | P             | GOLD      |
| Bacillus_cytotoxicus_NVH_391_98_uid58317            | P             | GOLD      |
| Bacillus_cereus_E33L_uid58103                       | P             | 16621833  |
| Bacillus_licheniformis_ATCC_14580_uid58199          | NP            | 15461803  |
| Bacillus_licheniformis_ATCC_14580_uid58097          | NP            | 15461803  |

|                                                         |    |            |
|---------------------------------------------------------|----|------------|
| Bacillus_subtilis_168_uid57675                          | NP | Bioproject |
| Bacillus_amyloliquefaciens_DSM_7_uid53535               | NP | GOLD       |
| Bacillus_cereus_G9842_uid58759                          | P  | GOLD       |
| Bacillus_cereus_Q1_uid58529                             | NP | GOLD       |
| Bacillus_cereus_ATCC_14579_uid57975                     | P  | Bioproject |
| Bacillus_cereus_ATCC_10987_uid57673                     | P  | Bioproject |
| Bacillus_thuringiensis_Al_Hakam_uid58795                | P  | GOLD       |
| Bacillus_cereus_AH820_uid58751                          | P  | GOLD       |
| Bacillus_weiheinstephanensis_KBAB4_uid58315             | NP | BacMap     |
| Bacillus_subtilis_BSn5_uid62463                         | NP | 21317323   |
| Bacillus_cereus_03BB102_uid59299                        | P  | 16954272   |
| Bacillus_subtilis_spizizenii_TU_B_10_uid73967           | NP | HOMD       |
| Bacillus_anthraxis_CDC_684_uid59303                     | P  | 21962024   |
| Bacillus_anthraxis_Sterne_uid58091                      | NP | 5          |
| Bacillus_anthraxis_A0248_uid59385                       | P  | GOLD       |
| Bacillus_anthraxis_Ames_Ancestor_uid58083               | P  | 18952800   |
| Bacillus_cereus_B4264_uid58757                          | P  | 10747152   |
| Bacillus_subtilis_spizizenii_W23_uid51879               | NP | 18723616   |
| Bacillus_thuringiensis_serovar_konkukian_97_27_uid58089 | P  | 9650985    |
| Bacillus_thuringiensis_BMB171_uid49135                  | P  | KEGG       |
| Bacillus_cereus_F837_76_uid83611                        | P  | 22374959   |
| Bacillus_megaterium_QM_B1551_uid15862                   | NP | 8025666    |
| Bacillus_amyloliquefaciens_FZB42_uid58271               | NP | 21811596   |
| Bacillus_selenitireducens_MLS10_uid49513                | NP | 9871015    |
| Bacillus_cellulosilyticus_DSM_2522_uid43329             | NP | GOLD       |
| Bacillus_clausii_KSM_K16_uid58237                       | NP | GOLD       |
| Bacillus_coagulans_2_6_uid68053                         | NP | GOLD       |
| Bacillus_halodurans_C_125_uid57791                      | NP | GOLD       |
| Bacillus_pumilus_SAFR_032_uid59017                      | NP | GOLD       |
| Bacillus_megaterium_DSM319_uid48371                     | NP | GOLD       |
| Bacillus_coagulans_36D1_uid54335                        | NP | GOLD       |
| Bacillus_pseudofirmus_OF4_uid45847                      | NP | GOLD       |
| <b>Pseudomonas spp.</b>                                 |    |            |
| Pseudomonas_aeruginosa_LESB58_uid59275                  | P  | GOLD       |
| Pseudomonas_aeruginosa_PA7_uid58627                     | P  | 20107499   |
| Pseudomonas_fluorescens_Pf_5_uid57937                   | NP | GOLD       |
| Pseudomonas_putida_GB_1_uid58735                        | NP | JGI        |
| Pseudomonas_syringae_B728a_uid57931                     | P  | 12670984   |
| Pseudomonas_putida_KT2440_uid57843                      | NP | GOLD       |
| Pseudomonas_fluorescens_SBW25_uid62971                  | NP | GOLD       |

|                                                             |    |          |
|-------------------------------------------------------------|----|----------|
| <i>Pseudomonas putida</i> _S16_uid68747                     | NP | GOLD     |
| <i>Pseudomonas syringae phaseolicola</i> _1448A_uid58099    | P  | 16159782 |
| <i>Pseudomonas syringae tomato</i> _DC3000_uid57967         | P  | GOLD     |
| <i>Pseudomonas putida</i> _W619_uid58651                    | NP | GOLD     |
| <i>Pseudomonas entomophila</i> _L48_uid58639                | P  | 16699499 |
| <i>Pseudomonas fluorescens</i> _Pf0_1_uid57591              | NP | GOLD     |
| <i>Pseudomonas aeruginosa</i> _PAO1_uid57945                | P  | 10984043 |
| <i>Pseudomonas brassicacearum</i> _NFM421_uid66303          | NP | 21515771 |
| <i>Pseudomonas aeruginosa</i> _UCBPP_PA14_uid57977          | P  | 11115892 |
| <i>Pseudomonas putida</i> _F1_uid58355                      | NP | GOLD     |
| <i>Pseudomonas mendocina</i> _NK_01_uid66299                | NP | 3        |
| <i>Pseudomonas stutzeri</i> _A1501_uid58641                 | NP | GOLD     |
| <i>Pseudomonas stutzeri</i> _ATCC_17588__LMG_11199_uid68749 | NP | 3        |
| <i>Pseudomonas mendocina</i> _ymp_uid58723                  | NP | GOLD     |
| <b>Burkholderia spp.</b>                                    |    |          |
| <i>Burkholderia vietnamiensis</i> _G4_uid58075              | P  | 22187530 |
| <i>Burkholderia glumae</i> _BGR1_uid59397                   | P  | 19329631 |
| <i>Burkholderia cenocepacia</i> _J2315_uid57953             | P  | 18931103 |
| <i>Burkholderia gladioli</i> _BSR3_uid66301                 | P  | GOLD     |
| <i>Burkholderia thailandensis</i> _E264_uid58081            | NP | GOLD     |
| <i>Burkholderia pseudomallei</i> _K96243_uid57733           | P  | 1        |
| <i>Burkholderia pseudomallei</i> _1710b_uid58391            | P  | 20368977 |
| <i>Burkholderia cenocepacia</i> _MC0_3_uid58769             | NP | 20090946 |
| <i>Burkholderia phymatum</i> _STM815_uid58699               | NP | JGI      |
| <i>Burkholderia</i> _YI23_uid81081                          | NP | 22275096 |
| <i>Burkholderia xenovorans</i> _LB400_uid57823              | NP | GOLD     |
| <i>Burkholderia ambifaria</i> _AMMD_uid58303                | NP | JGI      |
| <i>Burkholderia ambifaria</i> _MC40_6_uid58701              | P  | GOLD     |
| <i>Burkholderia</i> _CCGE1001_uid42975                      | NP | 4        |
| <i>Burkholderia</i> _CCGE1002_uid42523                      | NP | 4        |
| <i>Burkholderia phytovirans</i> _PsJN_uid58729              | NP | 21942451 |
| <i>Burkholderia pseudomallei</i> _668_uid58389              | P  | 2        |
| <i>Burkholderia pseudomallei</i> _1106a_uid58515            | P  | 2        |
| <i>Burkholderia cenocepacia</i> _HI2424_uid58369            | NP | 20090946 |
| <i>Burkholderia</i> _CCGE1003_uid46253                      | NP | 4        |
| <i>Burkholderia cenocepacia</i> _AU_1054_uid58371           | P  | 20090946 |

Pathogenicity status according to:

K = KEGG database (Kanehisa, 2012)

GOLD = Genomes Online Database (Pagani *et al.*, 2012)

Bioproject = NCBI Bioproject (Barrett *et al.*, 2012)

BacMap = BacMap database (Cruz *et al.*, 2012)

HOMD = Human Oral Microbiome Database (Chen *et al.*, 2010)

JGI = DOE Joint Genome Institute Portal (Grigoriev, *et al.*, 2012)

[#] = PubMedID (Sayers *et al.*, 2012)

1 = [http://www.bordeninstitute.army.mil/published\\_volumes/biological\\_warfare/BW-ch07.pdf](http://www.bordeninstitute.army.mil/published_volumes/biological_warfare/BW-ch07.pdf)

2 = <http://pathema.jcvi.org/cgi-bin/Burkholderia/shared/HtmlPage.cgi?page=strains>

GSCID = JCVI Genomic Sequencing Center for Infectious Diseases

3 = Not isolated from a person with consistent symptoms

4 = Coenye and Vandamme. *Burkholderia*: Molecular Microbiology and Genomics. 2006.

5 = The use of anthrax vaccines prepared from avirulent (uncapsulated) variants of *Bacillus anthracis*. Onderstepoort J. Vet. Sci. An. Ind. 13:307–312.

## Supplemental Methods

### **Comparing new sequences to the POG collection:**

1. Download the BLASTable POG database (4 files) from the <ftp://ftp.ncbi.nlm.nih.gov/pub/kristensen/extendedPOGs-10/blastdb/> folder
2. Download the stand-alone BLAST program from <ftp://ftp.ncbi.nlm.nih.gov/blast/>
3. Compare new proteins against POG using BLASTP with default parameters (PSI-BLAST with up to 3 iterations might produce better results).
4. In the output, initially consider the hits with the expect values of  $<10^{-5}$  (low stringency) and  $10^{-20}$  (high stringency).
